# Supplementary material for: Ankle Orthosis-induced Decrease in Repetitive Rebound Jump Height: Relationship With Restriction in Sagittal Ankle Range of Motion
Source: Research Square preprint supplement (doi:10.21203/rs.3.rs-892632/v1), 2021-09-27
Supplement: Supplementary file 2 [file 68a73b4d37883b44518a9d95.xlsx]

## Sheet: table1
		no-orthosis			orthosis 1			orthosis 2			p-valuea	effect size (f)	significance
	Squat jump
	Jump height, cm	26.5534	±	5.16489	26.4888	±	5.27574	25.2941	±	5.51907	0.00318354	0.594	no-orthosis, 1 vs 2
	RFD, N/s	2602.2	±	1158.09	2798.12	±	1181.81	2682.16	±	1203.25	0.633464	0.157
	rRFD, N/kg/s	42.8966	±	20.3492	46.2628	±	19.3983	45.0902	±	23.2806	0.643338	0.153
	Vertical impulse, Ns	166.149	±	49.2199	162.509	±	44.9399	168.441	±	54.6311	0.417024	0.217
	PeakPower, W	2356.17	±	705.513	2338.64	±	676.326	2274.17	±	686.554	0.00732893	0.543	no-orthosis vs 2
	VGRFmax, N	1421.3	±	308.376	1423.67	±	277.417	1427.56	±	285.57	0.939472	0.055
	rVGRFmax, N/kg	23.0138	±	2.18089	23.143	±	2.06818	23.1958	±	2.31899	0.831231	0.101
	Maximum dorsiflexion angle, degree	120.65	±	5.49321	125.431	±	6.80177	127.347	±	4.9818	<0.001	0.8113	no-orthosis vs 1, 2
	Plantarflexion angle at toe off, degree	171.155	±	5.79352	167.084	±	6.90855	163.272	±	4.46635	<0.001	1.077	no-orthosis vs 1 vs 2
	ROM, degree	50.2995	±	4.72954	41.6305	±	5.41133	35.7922	±	3.8761	<0.001	2.409	no-orthosis vs 1 vs 2
	Countermovement jump
	Jump height, cm	28.2674	±	5.59899	28.25	±	5.51073	27.7758	±	5.85285	N/A	N/A
	RFD, N/s	3276.56	±	1878.37	2971.08	±	1615.24	3061.92	±	1876.59	N/A	N/A
	rRFD, N/kg/s	53.9392	±	29.1812	49.2265	±	26.3695	50.7265	±	30.4621	N/A	N/A
	Vertical impulse, Ns	157.379	±	33.4054	141.179	±	37.5256	154.788	±	38.7926	N/A	N/A
	PeakPower, W	2458.75	±	741.691	2447.75	±	704.706	2422.96	±	718.082	N/A	N/A
	VGRFmax, N	1390.74	±	299.418	1356.42	±	271.279	1378.25	±	284.263	N/A	N/A
	rVGRFmax, N/kg	22.5245	±	2.00089	22.0346	±	2.08728	22.404	±	2.62594	N/A	N/A
	Maximum dorsiflexion angle, degree	117.575	±	7.61827	122.664	±	6.72391	124.484	±	6.07476	<0.001	0.703	no-orthosis vs 1, 2
	Plantarflexion angle at toe off, degree	170.916	±	6.29483	167.255	±	6.6979	163.892	±	4.61205	<0.001	0.883	no-orthosis vs 1 vs 2
	ROM, degree	53.2937	±	5.53487	44.5143	±	5.60959	39.2946	±	3.84569	<0.001	1.94	no-orthosis vs 1 vs 2
	Repetitive rebound jump
	Jump height, cm	26.26	±	6.59572	26.025	±	7.21743	25.1133	±	6.12481	N/A	N/A
	contact time, s	0.222933	±	0.0395901	0.2202	±	0.0388241	0.239167	±	0.0767619	N/A	N/A
	Rebound jump index, m/s	1.259	±	0.3362	1.243	±	0.313152	1.1825	±	0.308901	N/A	N/A
	Maximum dorsiflexion angle, degree	124.873	±	8.35568	128.841	±	7.37477	131.406	±	6.79293	<0.001	1.784	no-orthosis vs 1, 2
	Plantarflexion angle at toe off, degree	169.954	±	7.57743	165.875	±	7.40943	163.799	±	4.21885	<0.001	1.652	no-orthosis vs 1, 2
	Range of motion, degree	44.9416	±	7.53712	36.7978	±	6.03048	32.4341	±	5.42527	<0.001	1.825	no-orthosis vs 1 vs 2
